# Supplementary material for: Genetic Diversification and Dispersal of Taro (Colocasia esculenta (L.) Schott)
Source: PubMed Central journal article supplement (PMC4912093; doi:10.1371/journal.pone.0157712), 2016-06-17

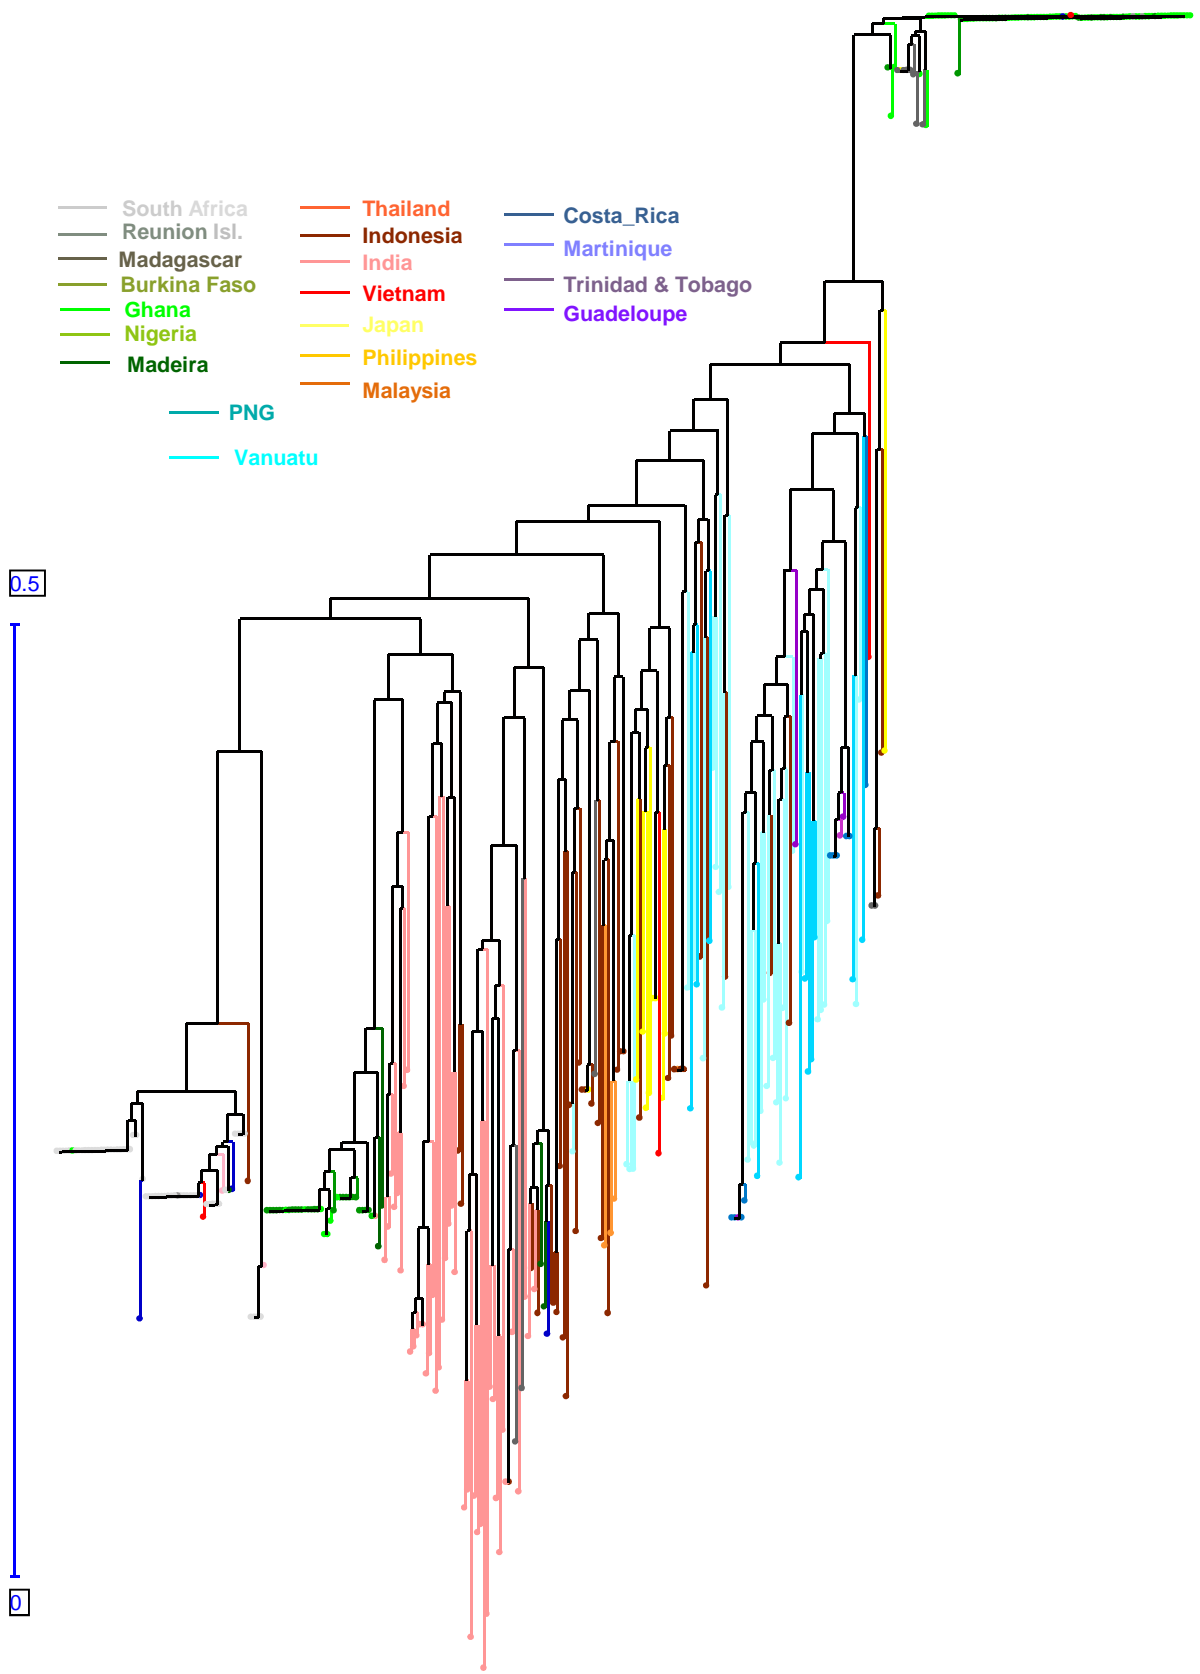

Supplement: pone.0157712.s001.pdf [file pone.0157712.s001.pdf]
