# Supplementary material for: Genetic Diversification and Dispersal of Taro (Colocasia esculenta (L.) Schott)
Source: PLoS One. 2016 Jun 17;11(6):e0157712. doi: 10.1371/journal.pone.0157712 (PMC4912093; doi:10.1371/journal.pone.0157712)
Supplement: S2 Table — Locus name, Repeat motif, Ta, Minimum and Maximum allele sizes (bp), Number of alleles obtained within our sample and authors. (XLSX) [file pone.0157712.s004.xlsx]

## Sheet: Feuil1
Locus	Repeat	Ta	Miminum allele size (bp)	Maximum allele size (bp)	Number of alleles	Authors
Ces-1A06	(CT)31	50	210	296	31	Quero-Garcia et al. 2006
Ces-1B02	(GA)9,(GA)16	50	197	283	20	Quero-Garcia et al. 2006
Ces-1B09	(AG)27	50	210	296	31	Quero-Garcia et al. 2006
Ces-1C03	(CT)14	50	107	177	21	Quero-Garcia et al. 2006
µQ103-220	(GT)10	62	243	249	4	Mace et al 2002
uq105-267	(AAT)10	65	270	299	12	Mace et al 2002
µQ84-207	(CT)18	65	202	256	20	Mace et al 2002
µQ88B-94	(CAT)9	62	101	113	6	Mace et al 2002
HK7	(CT)14,(CT)4	56	141	207	12	Hu et al 2009
HK22	(AG)18	53	179	253	18	Hu et al 2009
HK26	(CT)15	51	136	224	28	Hu et al 2009
